# Supplementary material for: OCT6 inhibits differentiation of porcine-induced pluripotent stem cells through MAPK and PI3K signaling regulation
Source: PubMed Central journal article supplement — Zool Res. 2022 Nov 18;43(6):911–22. doi: 10.24272/j.issn.2095-8137.2022.220 (PMC9700490; doi:10.24272/j.issn.2095-8137.2022.220), 2022-11-18
Supplement: zr-43-911-S1.pdf [file zr-43-911-S1.pdf]

## Supplementary Materials for

DOI: 10.24272/j.issn.2095-8137.2022.220

### **OCT6 inhibits differentiation of porcine-induced pluripotent stem cells through MAPK and PI3K signaling regulation**

Xin-Chun Yang<sup>1,#</sup>, Xiao-Long Wu<sup>1,#</sup>, Wen-Hao Li<sup>1</sup>, Xiao-Jie Wu<sup>1</sup>, Qian-Yan Shen<sup>1</sup>, Yun-Xiang Li<sup>1</sup>, Sha Peng<sup>1</sup>, Jin-Lian Hua<sup>1,\*</sup>

<sup>1</sup> College of Veterinary Medicine, Shaanxi Centre of Stem Cells Engineering & Technology, Northwest A & F University, Yangling, Shaanxi 712100, China

#Authors contributed equally to this work

\*Corresponding author, E-mail: jinlianhua@nwsuaf.edu.cn

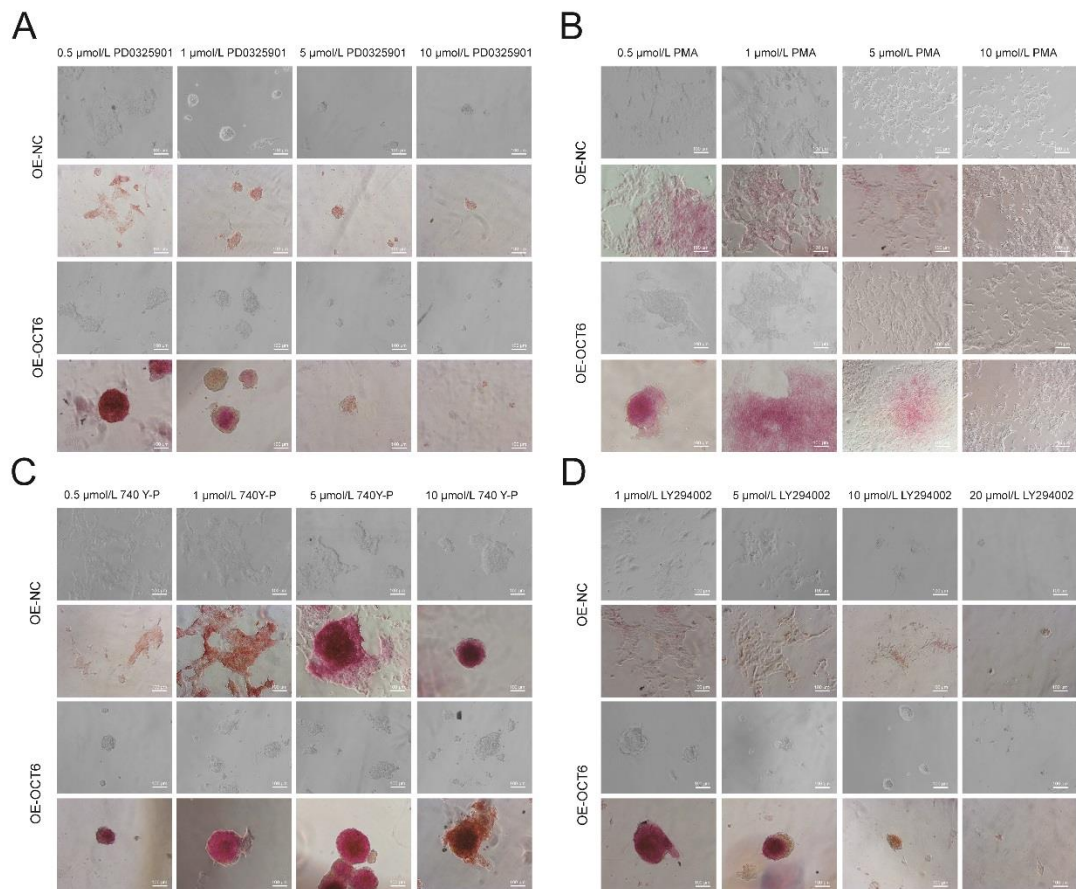

**Supplementary Figure S1 Effects of different doses of MAPK/ERK and PI3K signaling pathway activators or inhibitors on OE-OCT6 and OE-NC**

A. Representative images of bright field and AP-stained colonies after 5 days of colony growth of OE-NC and OE-OCT6 cell lines; 0.5  $\mu\text{mol/L}$  740Y-P, 1  $\mu\text{mol/L}$  740Y-P, 5  $\mu\text{mol/L}$  740Y-P, and 10  $\mu\text{mol/L}$  740Y-P represent concentrations of 740Y-P in medium. B. Representative images of bright field and AP-stained colonies after 5 days of colony growth of OE-NC and OE-OCT6 cell lines; 1  $\mu\text{mol/L}$  LY294002, 5  $\mu\text{mol/L}$  LY294002, 10  $\mu\text{mol/L}$  LY294002, and 20  $\mu\text{mol/L}$  LY294002 represent concentrations of LY294002 in medium.  $n=3$  independent experiments. Scale bar, 100  $\mu\text{m}$ . C. Representative images of bright field and AP-stained colonies after 5 days of colony growth of OE-NC and OE-OCT6 cell lines; 0.5  $\mu\text{mol/L}$  PD0325901, 1  $\mu\text{mol/L}$  PD0325901, 5  $\mu\text{mol/L}$  PD0325901, and 10  $\mu\text{mol/L}$  PD0325901 represent concentrations of PD0325901 in medium.  $n=3$  independent experiments. Scale bar, 100  $\mu\text{m}$ . D. Representative images of bright field and AP-stained colonies after 5 days of colony growth of OE-NC and OE-OCT6 cell lines; 0.5  $\mu\text{mol/L}$  PMA, 1  $\mu\text{mol/L}$  PMA, 5  $\mu\text{mol/L}$  PMA, and 10  $\mu\text{mol/L}$  PMA represent concentrations of 12-O-tetradecanoyl phorbol-13-acetate in medium.  $n=3$  independent experiments. Scale bar, 100  $\mu\text{m}$ .

**Supplementary Table S1 Information on primers used in this experiment**

| <b>Gene</b>        | <b>Forward sequence</b>                  | <b>Reverse sequence</b>                  |
|--------------------|------------------------------------------|------------------------------------------|
| <i>OCT6</i> -Clone | ATGACGATGACAAGGAATTCATGGCCAC<br>CACCGCGC | CTTCCTCTGCCCTCGGATCCCTGCACGG<br>AGCCGGGC |
| EX- <i>OCT6</i>    | ACAAGGAATTCATGGCCA                       | CCTCGGATCCCTGCACGG                       |
| <i>OCT6</i>        | CTTTCTCAAGTGCCCCAAGC                     | TCCGGGTGCGTAAACGTC                       |
| Endo- <i>OCT4</i>  | CTTACCACCCTGTACTCCTCG                    | CAGGCTTCTCTCCCTAGCTCAC                   |
| Endo- <i>SOX2</i>  | ATGTCCCAGCACTACCAGAGCG                   | CTTACTCTCCTCCCATTTCCTCT                  |
| <i>OSKM</i>        | TCGGACCACCTTGCCTTACAC                    | CAACGCCCAAAGGAAATCCAG                    |
| <i>LIN28A</i>      | GAAGTCTGCTAAGGGCTTGGGAATC                | TGTCTCCCTTGGATCTGCGTTT                   |
| <i>PAX5</i>        | ATTACCCGACTCCTCGGACC                     | GCCTGACACCTTGATGAGCA                     |
| <i>SIX6</i>        | AACTGGTTCAAAAACCGCCG                     | GTGATGGAGATGGCCGAAGT                     |
| <i>SOX3</i>        | CCGAGACAACGCATCAGGT                      | CCACGGTGAAAAGGCCTGAG                     |
| <i>NACN</i>        | CCAGCATCCACTCACCTGAA                     | TCATATTGCAGCCCCGTGT                      |
| <i>NNAT</i>        | CGGATACTTAAGGCGCAGCTA                    | TGATGAGCAGTTCAGCCGAG                     |
| <i>L1CAM</i>       | GCTGTGCGCTTATGTCCACT                     | GTCCACAGGGTTCTTCTCCG                     |
| <i>CLU</i>         | CCAGAGCTCCCCCTTCTACT                     | CCAGAGCTCCCCCTTCTACT                     |
| <i>COL5A1</i>      | GGACGGTGAATACTGGGTGG                     | AAGTGATTCTGGCCCCCTTCG                    |
| <i>DUSP5</i>       | CATCAAGCAGAGGAGGAGTGTG                   | GTAGGGAATGTGCAGTAGGAACC                  |
| <i>DUSP8</i>       | GTTCCCATCAACGACAATACTG                   | AGGACATGCCCATTTGCTTCA                    |
| <i>DUSP10</i>      | TTGAGGAAGCTCACCAGTGTG                    | GAAGTTCAGGTTCCGGGAAATAAT                 |
| <i>FGFR3</i>       | GTACACAAGGTCTCCCGCTT                     | CTCGAGCTCCGAAACGTTGG                     |
| <i>RRAS</i>        | GTTTCAACGAGGTGGGCAAG                     | GCTTCGGATCTGGGAACCTG                     |
| <i>TEX</i>         | ATCTCAAGCACCAGCAGACC                     | TTTGAAGGCTTGGGCCATT                      |
| <i>PDGFB</i>       | GGCTGGACACCGGAGAATAC                     | ACTCGGCATGGAATTGTGGT                     |
| <i>PTPRR</i>       | GTACACTTCATGGCCGGATCA                    | CGTCCACAACCTCCTTCTCTCT                   |
| <i>COL2A1</i>      | AGTGGTGGTGGTTATGATTTTGATA                | CATGTGCGAGCTGGGTCTTT                     |
| <i>ITGB4</i>       | GCCCTTCTGAGTGTGACGCTT                    | GCAGTAGGCACAGTCCTTGT                     |
| <i>LPAR1</i>       | ATCCGTGGCCAACTTACTGG                     | ATGACCACGATCACCACCAC                     |
| <i>MAG11</i>       | GAACCTCCCTGAACACGGTGA                    | ATGCATTGCCGAAAGTCGTG                     |
| <i>MAG12</i>       | TAGGCAACAAGTGCCACCAA                     | TAGGCTGTCCAGGCTCATCT                     |
| <i>PPP2R3A</i>     | ATAGACCGCGTTTTGAGCA                      | CACAGGGATGTGCAAGAGGT                     |
| <i>GNB5</i>        | AGATGATGCTACGTGTCGCC                     | AACAGGATGGAGACTCGGGA                     |
